# Supplementary material for: Reliability of the Term “Serious Mental Illness”: A Systematic Review
Source: Atypon-hosted journal article supplement (doi:10.1176/appi.ps.202100661), 2022-07-27
Supplement: appi.ps.202100661.ds001.pdf [file appi.ps.202100661.ds001.pdf]

Online supplement for 10.1176/appi.ps.202100661

### Online Supplement: Database Search Terms

#### PsycInfo and PsycArticles:

("serious\* mental\* ill\*" OR "serious\* and persistent\* mental\* ill\*" OR "serious\* emotion\* disturb\*" OR "severe\* mental\* ill\*" OR "severe\* and persistent\* mental\* ill\*" OR "severe\* emotion\* disturb\*")

AND ("double-blind" OR "random\* assign\*" OR "control" OR "Effectiveness" OR "Evaluation" OR "Treatment Outcomes")

AND Year: 2015 To 2019

AND "peer reviewed"

#### PubMed:

((("serious mental illness" OR "seriously mentally ill" OR "serious and persistent mental illness" OR "seriously and persistently mentally ill" OR "serious emotional disturbance" OR "seriously emotionally disturbed" OR "severe mental illness" OR "severely mentally ill" OR "severe and persistent mental illness" OR "severely and persistently mentally ill" OR "severe emotional disturbance" OR "severely emotionally disturbed")) AND ("double-blind" OR "random assignment" OR "randomly assigned" OR "control" OR "effectiveness" OR "evaluation" OR "treatment outcome")) AND ("2015/01/01"[Date - Publication] : "2019/12/31"[Date - Publication])

### Online Supplement: PRISMA Flow Diagram

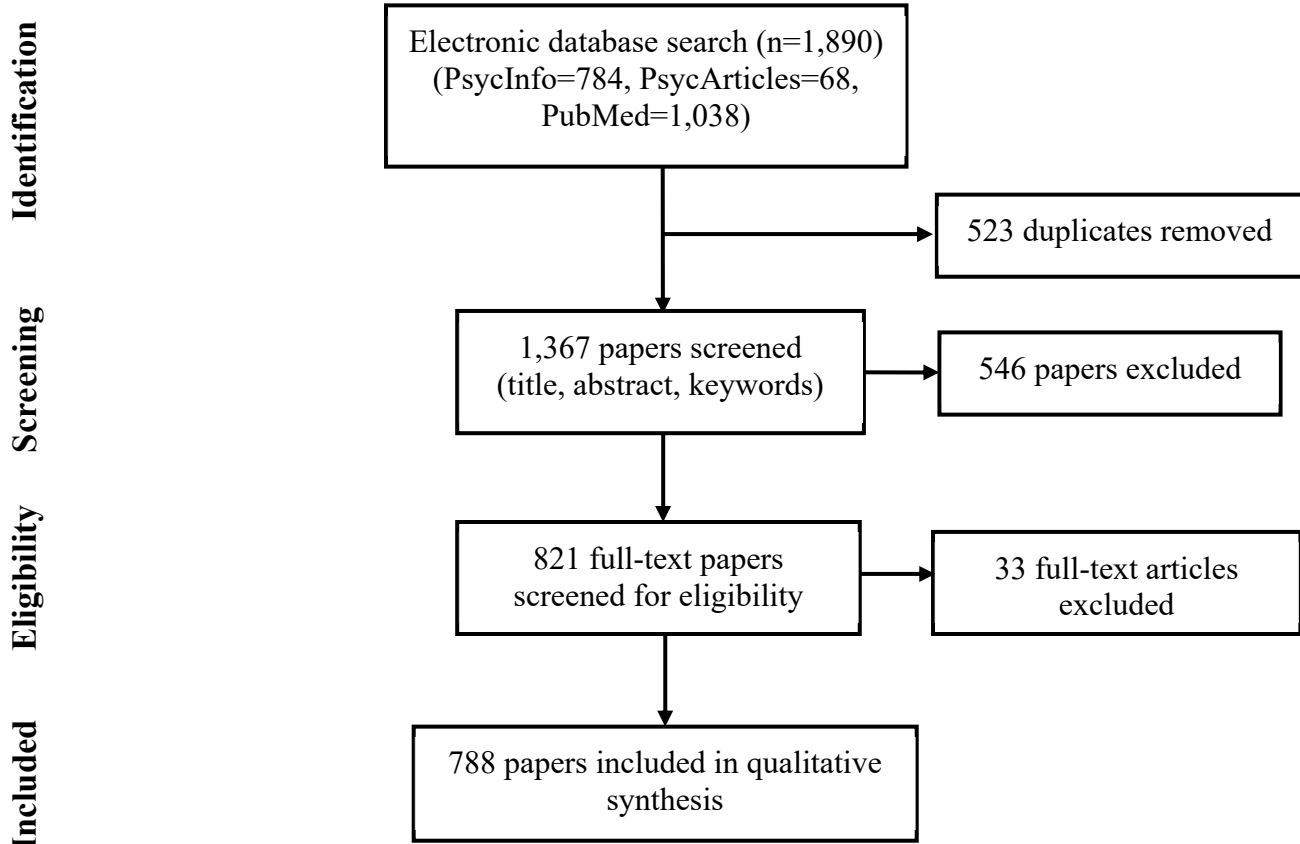

*Note.* Record numbers from initial electronic database searches reflect the total abstracted records through December 31, 2019, as of January 2020. Search replications beyond 2020 may result in slight variation in number of records due to delays in abstracting and changes in online first publication dates.
